# Supplementary material
Source: PubMed Central journal article supplement (PMC528976)
Supplement: pnas_101_46_16091__1.pdf [file pnas_101_46_16091__1.pdf]

**Table 1. Primers for PCR amplification**

| Use                     | Reference  |             | Sequence from 5' to 3'                              |                          |
|-------------------------|------------|-------------|-----------------------------------------------------|--------------------------|
|                         | Gene       | Code        |                                                     |                          |
| Probes for<br>RNA Blots | PSBS-F     | EMO238      | TGTTTGGGTTACGGAAGCGAACGAG                           |                          |
|                         | PSBS-R     | EMO239      | GCTAGATGATATCAATCACCTAGTCACTTAGG                    |                          |
|                         | CAO-F      | EMO240      | GCTTAAACGAAGATCTACTGGCTAGTTTTAGG                    |                          |
|                         | CAO-R      | EMO241      | CTGATATTCAATTTCTCATAGAGAGTGAAGTGTACAC               |                          |
|                         | PSBW-F     | EMO244      | GCATTGTCTTATCTTCATGCTCTGTTCTTCC                     |                          |
|                         | PSBW-R     | EMO245      | AGATTAAACCAAATTTAATCAGAACAAAAGCCTAGATTACC           |                          |
|                         | CHLH-F     | EMO246      | GTGAGGACACTATCTGAGACAGTGAGG                         |                          |
|                         | CHLH-R     | EMO247      | CGCATATAAAATCCACACATATGAATATGATATAAGAAATGG          |                          |
|                         | MBB1-F     | EMO250      | TGTTGATGATGCTTCGTGGGTCACAGG                         |                          |
|                         | MBB1-R     | EMO251      | GAGAATGAGAATCTCCCAAACCTTTCTAAAATTATAAC              |                          |
|                         | AP2-F      | EMO252      | TCAGTTTTAAAAGATCCAACGATCAAGATCAAAAATTC              |                          |
|                         | AP2-R      | EMO253      | ATACAAAGAATATTAACACAAGATTTGTTTGACACCTAATTAATTTTTTCC |                          |
|                         | WRKY-F     | EMO254      | GTTTATCGTCACTTACACGGCGGAGC                          |                          |
|                         | WRKY-R     | EMO255      | GAGACAAAGACCATAACTCCATAAGTAAATCG                    |                          |
|                         | PSY-F      | EMO258      | GCTTTAGTCTTTTACCAGTTTGATCCAATTCTGG                  |                          |
|                         | PSY-R      | EMO259      | CGTCTTAGCATATTCAGCGCAAACCTCACC                      |                          |
|                         | ELIP-F     | EMO260      | GTGAGTACGAAGTTTGGAGATTTGCTAGC                       |                          |
|                         | ELIP-R     | EMO261      | GGTTTTAAATTTTGATTGATTGACACACTGTTAAAACCTC            |                          |
|                         | COL2-F     | EMO262      | TTCCATTATCTGCAAACCTTTGCAGCTCC                       |                          |
|                         | COL2-R     | EMO263      | ATGGTTTAGGTCCTTTAAGGAGTTGTTGTTGTAGTGAGC             |                          |
|                         | EIF4-F     | JTEIF4-F    | CTGACAACATCAAGATGTTTGTCTCGATG                       |                          |
|                         | EIF4-R     | JTEIF4-R    | GTCCCTGGTGTCTGGTCCATGTCT                            |                          |
|                         | SIGE-F     | EMO226      | GGAGTTGTGTCTATTTCAAGTTCAGC                          |                          |
|                         | SIGE-R     | EMO227      | CCAGTCCAAGCTCACTATATCATTAG                          |                          |
|                         | PIF3-F     | 15TF        | ATGCCTCTGTTTGAGCTTTTC                               |                          |
|                         | PIF3-R     | JO128       | TCACGACGATCCACAAAACCTGATC                           |                          |
|                         | PHYB-F     | 17.9FW      | AATAGAGGTTTTTGGAGAC                                 |                          |
|                         | PHYB-R     | EMO215      | TATGGCATCATCAGCATCAT                                |                          |
|                         | Genotyping | pif3-3 wt-F | EMO127                                              | AGAAGCAATTTGGTCACCATGCTC |
|                         |            | pif3-3 wt-R | EMO128                                              | TGCATACAAATAGTCGATCGTATG |
| pif3-3 del-F            |            | EMO204      | GGTGTGTATGTGAGAAGGTACATCCATCG                       |                          |
| pif3-3 del-R            |            | EMO205      | AAGCTTAGCTTTGGTGAGCCTGAAAAGCTC                      |                          |
| pif3-2 wt-F             |            | EMO54       | TCTTAACGAGTCTGTTGCTTCTGCTACGCC                      |                          |
| pif3-2 wt-R             |            | EMO99       | TTTCAAGTTACTGTTGTTATTCGTCGTTG                       |                          |
| pif3-2 TDNA-F           |            | EMO54       | TCTTAACGAGTCTGTTGCTTCTGCTACGCC                      |                          |
| pif3-2 TDNA-R           |            | EMO49       | GGCAATCAGCTGTTGCCCGTCTCACTGGTG                      |                          |
| pif3-1 wt-F             |            | EMO54       | TCTTAACGAGTCTGTTGCTTCTGCTACGCC                      |                          |
| pif3-1 wt-R             |            | EMO99       | TTTCAAGTTACTGTTGTTATTCGTCGTTG                       |                          |
| pif3-1 TDNA-F           |            | EMO54       | TCTTAACGAGTCTGTTGCTTCTGCTACGCC                      |                          |
| pif3-1 TDNA-R           |            | EMO49       | GGCAATCAGCTGTTGCCCGTCTCACTGGTG                      |                          |
