# Supplementary material
Source: PubMed Central journal article supplement (PMC528976)
Supplement: pnas_101_46_16091__3.pdf [file pnas_101_46_16091__3.pdf]

**Table 6. Gene set 1 (46 genes):** Continuous red light (Rc)-induced genes defined as both robustly Rc-light-induced and moderately to robustly dependent on PIF3 for this Rc-light-induction.

| AGI LOCUS                               | DESCRIPTION                                                     | MFI(WT)<br>(R1/D1) | MFI(pif3)<br>(R1/D1) | MFIR<br>(WT/pif3) | BIN      |
|-----------------------------------------|-----------------------------------------------------------------|--------------------|----------------------|-------------------|----------|
| <b>Transcription (TX)</b>               |                                                                 |                    |                      |                   |          |
| AT5G24120                               | RNA polymerase sigma subunit SigE (sigE)                        | 23.28              | 11.98                | 1.94              | B        |
| AT3G02380                               | zinc finger protein CONSTANS-LIKE 2 (COL2)                      | 11.25              | 4.40                 | 2.55              | A        |
| AT5G47610                               | zinc finger (C3HC4-type RING finger)                            | 4.45               | 2.70                 | 1.65              | B        |
| AT4G26150                               | zinc finger (GATA type)                                         | 3.36               | 1.69                 | 1.99              | B        |
| AT5G56860                               | zinc finger (GATA type)                                         | 2.45               | 1.33                 | 1.84              | B        |
| AT1G07050                               | Zinc finger protein Constans-like 15 (COL15)                    | 2.42               | 1.54                 | 1.56              | B        |
| <b>Photosynthesis/Chloroplast (P/C)</b> |                                                                 |                    |                      |                   |          |
| <b>AT4G14690</b>                        | <b>chlorophyll A-B binding family protein/ELIP</b>              | <b>13.73</b>       | <b>5.51</b>          | <b>2.49</b>       | <b>A</b> |
| AT3G22840                               | chlorophyll A-B binding family protein/ELIP                     | 13.47              | 5.89                 | 2.29              | A        |
| AT4G27030                               | expressed protein                                               | 3.85               | 2.35                 | 1.64              | B        |
| <b>AT2G05100</b>                        | <b>chlorophyll A-B binding protein / LHCII type II</b>          | <b>3.76</b>        | <b>1.35</b>          | <b>2.79</b>       | <b>A</b> |
| AT1G14345                               | expressed protein                                               | 3.45               | 2.01                 | 1.72              | B        |
| AT3G17040                               | Psbs maturation factor                                          | 3.10               | 1.89                 | 1.64              | B        |
| AT1G44446                               | chlorophyll a oxygenase (CAO) / chlorophyll b synthase          | 3.06               | 1.99                 | 1.53              | B        |
| AT1G44000                               | expressed protein                                               | 3.05               | 1.74                 | 1.75              | B        |
| AT5G54270                               | chlorophyll A-B binding protein / LHCII type III                | 3.02               | 1.07                 | 2.81              | A        |
| <b>AT3G54890</b>                        | <b>chlorophyll A-B binding protein / LHCI type I</b>            | <b>2.84</b>        | <b>1.19</b>          | <b>2.39</b>       | <b>A</b> |
| <b>AT5G13630</b>                        | <b>magnesium-chelatase subunit chloroplast, putative (CHLH)</b> | <b>2.73</b>        | <b>1.32</b>          | <b>2.06</b>       | <b>A</b> |
| AT1G80130                               | expressed protein                                               | 2.68               | 1.32                 | 2.04              | A        |
| AT2G34430                               | chlorophyll A-B binding protein / LHCII type I                  | 2.46               | 1.21                 | 2.03              | A        |
| AT3G59400                               | genomes uncoupled 4 (GUN4)                                      | 2.42               | 1.12                 | 2.16              | A        |
| <b>AT1G50250</b>                        | <b>FTSH1, chloroplast</b>                                       | <b>2.42</b>        | <b>1.48</b>          | <b>1.63</b>       | <b>B</b> |
| AT5G57345                               | expressed protein                                               | 2.32               | 1.41                 | 1.65              | B        |
| AT2G23670                               | expressed protein                                               | 2.28               | 1.31                 | 1.74              | B        |
| <b>AT4G33010</b>                        | <b>glycine decarboxylase</b>                                    | <b>2.23</b>        | <b>1.14</b>          | <b>1.96</b>       | <b>B</b> |
| AT5G08050                               | expressed protein                                               | 2.08               | 1.23                 | 1.69              | B        |
| AT2G21330                               | fructose-bisphosphate aldolase                                  | 2.03               | 0.78                 | 2.61              | A        |
| AT2G33250                               | expressed protein                                               | 2.01               | 1.18                 | 1.71              | B        |
| <b>Cellular Metabolism (CM)</b>         |                                                                 |                    |                      |                   |          |
| AT5G49730                               | ferric reductase-like                                           | 3.44               | 2.19                 | 1.57              | B        |
| AT3G21560                               | UDP-glucosyltransferase                                         | 3.36               | 1.74                 | 1.93              | B        |
| AT2G01290                               | ribose 5-phosphare isomerase                                    | 2.50               | 1.58                 | 1.58              | B        |
| AT1G27480                               | lecithin:cholesterol acyltransferase family protein / LACT      | 2.40               | 1.23                 | 1.94              | B        |
| AT3G23530                               | cyclopropane fatty acid synthase, chalcone synthase (CHSY)      | 2.35               | 1.03                 | 2.27              | A        |
| AT5G13930                               | chalcone synthase / naringenin-putative / CPA-FA synthase       | 2.05               | 1.23                 | 1.67              | B        |

|                                   |                                                           |      |      |      |   |
|-----------------------------------|-----------------------------------------------------------|------|------|------|---|
| <b>Signaling (S)</b>              |                                                           |      |      |      |   |
| AT5G24850                         | cryptochrome dash (CRYD)                                  | 6.55 | 4.05 | 1.62 | B |
| AT5G23730                         | transducin family protein / WD-40 repeat                  | 3.76 | 2.21 | 1.70 | B |
| <b>Transport (TR)</b>             |                                                           |      |      |      |   |
| AT1G17100                         | SOUL heme-binding family protein                          | 5.34 | 2.57 | 2.08 | A |
| AT3G21670                         | nitrate transporter (NTP3)                                | 3.27 | 2.12 | 1.54 | B |
| AT1G75460                         | ATP-dependent protease La (LON) domain-containing protein | 3.20 | 1.79 | 1.78 | B |
| AT3G27170                         | chloride channel protein (CLC-b)                          | 2.68 | 1.58 | 1.69 | B |
| AT2G03750                         | sulfotransferase family protein                           | 2.02 | 1.13 | 1.79 | B |
| <b>Growth/Development (G/D)</b>   |                                                           |      |      |      |   |
| AT2G36870                         | xyloglucan:xyloglucosyl transferase                       | 2.45 | 1.13 | 2.17 | A |
| <b>Stress/Defense (S/D)</b>       |                                                           |      |      |      |   |
| AT4G09350                         | DNAJ heat shock N-terminal domain-containing protein      | 2.37 | 1.48 | 1.60 | B |
| <b>Hypothetical/Unknown (H/U)</b> |                                                           |      |      |      |   |
| AT5G55620                         | expressed protein                                         | 3.77 | 1.80 | 2.10 | A |
| AT5G42760                         | O-methyltransferase N-terminus domain-containing protein  | 2.67 | 1.43 | 1.86 | B |
| AT1G42550                         | expressed protein                                         | 2.42 | 1.58 | 1.53 | B |
| AT1G49660                         | expressed protein                                         | 2.07 | 1.30 | 1.59 | B |

This set comprises genes displaying a 2-fold or greater increase in expression in response to 1 h Rc in WT from Bins A and B of Figure 3 combined. The genes in Bins A and B of Figure 3 display a 1.5-fold or greater increase in expression in WT compared to *pif3* in response to 1 h Rc.

Column-heading definitions:

**AGI locus:** AGI locus number.

**Description:** Brief gene description or name derived primarily from current TIGR and TAIR websites.

**MFI(WT)(R1/D1):** Mean Fold Induction of expression in wild-type (WT) Arabidopsis seedlings exposed to 1 h Rc (R1) over the level in dark control seedlings (D1).

**MFI(*pif3*)(R1/D1):** Mean Fold Induction of expression in *pif3* mutant seedlings exposed to 1 h Rc (R1) over the levels in dark control seedlings (D1).

**MFIR(WT/*pif3*):** Mean Fold Induction Ratio = [MFI(WT)(R1/D1)] ÷ [MFI(*pif3*)(R1/D1)].

**Bin:** From Fig. 3. Bin A: genes with MFIR(WT/*pif3*) of  $\geq 2$ . Bin B: genes with a MFIR(WT/*pif3*) of 1.5-2.

Genes in bold-face type were identified as being phyB-regulated at 1 h of Rc in a previous study using the 8000-gene Affymetrix array (1). Genes are grouped into functional categories as indicated and arrayed within these categories by magnitude of Rc-responsiveness in WT (MFI(WT)(R1/D1)) in descending order.

1. Tepperman, J. M., Hudson, M. E., Khanna, R., Zhu, T., Chang, H.-S., Wang, X. & Quail, P. H. (2004) *Plant J.* **38**, 725-739.
