# Supplementary material
Source: PubMed Central journal article supplement (PMC528976)
Supplement: pnas_101_46_16091__4.pdf [file pnas_101_46_16091__4.pdf]

**Table 7. Gene set 6 (26 genes):** Continuous red light (Rc)-induced genes defined as robustly Rc-responsive and phyB-dependent, but not PIF3-dependent for this Rc-responsiveness.

| AGI LOCUS                               | DESCRIPTION                                                        | MFI(WT)<br>(R1/D1) | MFI(pif3)<br>(R1/D1) | MFIR<br>(WT/pif3) |
|-----------------------------------------|--------------------------------------------------------------------|--------------------|----------------------|-------------------|
| <b>Transcription (TX)</b>               |                                                                    |                    |                      |                   |
| AT2G31380                               | zinc finger (B-box type) family protein (ZF3)                      | 13.67              | 11.08                | 1.23              |
| AT2G21320                               | zinc finger (B-box type) family protein (ZF6)                      | 5.30               | 4.02                 | 1.32              |
| AT1G01060                               | myb family transcription factor (LHY)                              | 2.30               | 2.06                 | 1.12              |
| AT5G62470                               | myb family transcription factor (MYB96)                            | 1.82               | 2.80                 | 0.65              |
| <b>Photosynthesis/Chloroplast (P/C)</b> |                                                                    |                    |                      |                   |
| AT1G78510                               | solanesyl diphosphate synthase (SPS)                               | 3.00               | 2.43                 | 1.23              |
| AT1G62180                               | 5'-adenylylsulfate reductase 2, chloroplast (APR2) (APSR)          | 1.76               | 1.30                 | 1.36              |
| AT5G17230                               | phytoene synthase (PSY)                                            | 1.86               | 1.19                 | 1.56              |
| <b>Cellular Metabolism (CM)</b>         |                                                                    |                    |                      |                   |
| AT1G78820                               | curculin-like (mannose-binding) lectin family protein              | 1.66               | 1.86                 | 0.89              |
| AT4G27820                               | glycosyl hydrolase family 1 protein                                | 1.45               | 1.61                 | 0.90              |
| AT3G25230                               | peptidyl-prolyl cis-trans isomerase                                | 1.41               | 1.80                 | 0.78              |
| AT1G76690;AT1G76700                     | 12-oxophytodienoate reductase (OPR2)                               | 1.62               | 7.58                 | 0.21              |
| <b>Signaling (S)</b>                    |                                                                    |                    |                      |                   |
| AT1G22770                               | gigantea protein (GI)                                              | 2.99               | 2.60                 | 1.15              |
| <b>Transport (TR)</b>                   |                                                                    |                    |                      |                   |
| AT1G64780                               | ammonium transporter 1, member 2 (AMT1.2)                          | 1.06               | 1.18                 | 0.90              |
| AT3G47950;AT3G47960                     | ATPase, plasma membrane-type, (POT) family protein                 | 2.20               | 1.60                 | 1.37              |
| AT4G13510                               | ammonium transporter 1, member 1 (AMT1.1)                          | 1.34               | 1.14                 | 1.18              |
| <b>Growth/Development (G/D)</b>         |                                                                    |                    |                      |                   |
| AT4G23990                               | cellulose synthase family protein                                  | 1.63               | 1.22                 | 1.34              |
| <b>Stress/Defense (S/D)</b>             |                                                                    |                    |                      |                   |
| AT1G10370                               | glutathione S-transferase, putative (ERD9)                         | 1.63               | 1.41                 | 1.16              |
| AT3G12580                               | heat shock protein 70, putative (HSP70)                            | 2.76               | 10.62                | 0.26              |
| AT5G36910                               | thionin (THI2.2)                                                   | 2.38               | 1.64                 | 1.46              |
| AT5G52310                               | low-temperature- /desiccation-responsive (LTI78)/ (RD29A)          | 1.21               | 1.39                 | 0.87              |
| AT3G23990                               | chaperonin (CPN60) (HSP60)                                         | 1.18               | 1.16                 | 1.01              |
| AT4G35060                               | heavy-metal-associated domain-containing protein (CCH)<br>-related | 1.28               | 1.62                 | 0.79              |
| AT1G19670                               | coronatine-responsive protein 1 (COR11)                            | 2.68               | 1.98                 | 1.36              |
| <b>Hypothetical/Unknown (H/U)</b>       |                                                                    |                    |                      |                   |
| AT2G46420                               | expressed protein                                                  | 2.66               | 2.09                 | 1.27              |
| AT4G26850                               | expressed protein                                                  | 2.98               | 2.12                 | 1.41              |
| AT2G35260                               | expressed protein                                                  | 1.75               | 1.20                 | 1.46              |

This set comprises genes that were defined previously by Tepperman et al. (1) as Rc-light-responsive in a phyB-dependent manner, but were not found in the present study to be statistically dependent on PIF3 for this Rc-responsiveness.

Column-heading definitions:

**AGI locus:** AGI locus number.

**Description:** Brief gene description or name derived primarily from current TIGR and TAIR websites.

**MFI(WT)(R1/D1):** Mean Fold Induction of expression in wild-type (WT) Arabidopsis seedlings exposed to 1 h Rc (R1) over the level in dark control seedlings (D1).

**MFI(*pif3*)(R1/D1):** Mean Fold Induction of expression in *pif3* mutant seedlings exposed to 1 h Rc (R1) over the levels in dark control seedlings (D1).

**MFIR(WT/*pif3*):** Mean Fold Induction Ratio =  $[\text{MFI(WT)(R1/D1)}] \div [\text{MFI}(pif3)(R1/D1)]$ .

**Bin:** From Fig. 3.

Genes are grouped into functional categories as indicated and arrayed within these categories by magnitude of Rc-responsiveness in WT (MFI(WT)(R1/D1)) in descending order.

1. Tepperman, J. M., Hudson, M. E., Khanna, R., Zhu, T., Chang, H.-S., Wang, X. & Quail, P. H. (2004) *Plant J.* **38**, 725-739.
