# Supplementary material
Source: PubMed Central journal article supplement (PMC528976)
Supplement: pnas_101_46_16091__5.pdf [file pnas_101_46_16091__5.pdf]

**Table 8. Gene set 2 (143 genes):** Continuous red light (Rc)-induced genes defined as robustly Rc-light-responsive, but not, or only marginally, depending on PIF3 for this Rc-light-responsiveness.

| AGI LOCUS                 | DESCRIPTION                                                                       | MFI(WT)<br>(R1/D1) | MFI( <i>pif3</i> )<br>(R1/D1) | MFIR<br>(WT/ <i>pif3</i> ) | BIN |
|---------------------------|-----------------------------------------------------------------------------------|--------------------|-------------------------------|----------------------------|-----|
| <b>Transcription (TX)</b> |                                                                                   |                    |                               |                            |     |
| AT2G46790                 | pseudo-response regulator 9 (APRR9) / (TOC1-L1)                                   | 25.50              | 33.19                         | 0.77                       | X   |
| AT2G31380                 | zinc finger (B-box type) family protein (ZF3)                                     | 13.67              | 11.08                         | 1.23                       | D   |
| AT5G44190                 | myb family transcription factor (GLK2)                                            | 8.11               | 6.06                          | 1.34                       | C   |
| AT2G30520                 | signal transducer of phototropic response (RPT2)                                  | 8.11               | 5.55                          | 1.46                       | C   |
| AT3G21890                 | zinc finger (B-box type) family protein                                           | 7.21               | 8.51                          | 0.85                       | X   |
| AT5G24470                 | pseudo-response regulator 5 (APRR5)                                               | 7.21               | 7.48                          | 0.96                       | X   |
| AT5G17300                 | myb family transcription factor                                                   | 6.21               | 5.73                          | 1.08                       | X   |
| AT3G17609                 | bZIP transcription factor family protein / HY5-like protein (HYH) nearly          | 5.90               | 4.71                          | 1.25                       | X   |
| AT5G11260                 | bZIP protein HY5 (HY5)                                                            | 5.61               | 6.62                          | 0.85                       | X   |
| AT3G47500                 | Dof-type zinc finger domain-containing protein (DOF)                              | 5.32               | 5.10                          | 1.04                       | X   |
| AT2G21320                 | zinc finger (B-box type) family protein (ZF6)                                     | 5.30               | 4.02                          | 1.32                       | C   |
| AT2G46830                 | myb-related transcription factor (CCA1)                                           | 4.18               | 3.87                          | 1.08                       | X   |
| AT5G15850                 | zinc finger protein CONSTANS-LIKE 1 (COL1)                                        | 4.10               | 3.05                          | 1.35                       | C   |
| AT1G18330                 | myb family transcription factor                                                   | 4.07               | 4.06                          | 1.00                       | X   |
| AT3G54990                 | AP2 domain-containing transcription factor                                        | 3.95               | 2.93                          | 1.35                       | C   |
| AT2G39250                 | AP2 domain-containing transcription factor                                        | 3.85               | 3.51                          | 1.10                       | X   |
| AT4G25470                 | DRE-binding protein (DREB1C) / CRT/DRE-binding factor 2 (CBF2)                    | 3.67               | 4.90                          | 0.75                       | X   |
| AT1G06040                 | zinc finger (B-box type) family protein / salt-tolerance protein (STO) (ZF2)      | 3.61               | 3.51                          | 1.03                       | X   |
| AT1G01520                 | myb family transcription factor                                                   | 3.46               | 3.98                          | 0.87                       | X   |
| AT5G54470                 | zinc finger (B-box type) family protein                                           | 3.32               | 3.01                          | 1.10                       | X   |
| AT5G37260                 | myb family transcription factor                                                   | 3.00               | 2.92                          | 1.03                       | X   |
| AT3G16350                 | myb family transcription factor ;                                                 | 2.97               | 2.07                          | 1.43                       | C   |
| AT1G43160                 | AP2 domain-containing protein RAP2.6 (RAP2.6)                                     | 2.92               | 3.67                          | 0.79                       | E   |
| AT2G28550                 | AP2 domain-containing transcription factor RAP2.7 (RAP2.7) nearly                 | 2.89               | 2.35                          | 1.23                       | D   |
| AT5G35970                 | DNA-binding protein                                                               | 2.82               | 1.94                          | 1.45                       | C   |
| AT4G38960                 | zinc finger (B-box type) family protein zinc finger protein-- <i>Oryza sativa</i> | 2.45               | 2.14                          | 1.15                       | X   |
| AT1G62030                 | DC1 domain-containing protein                                                     | 2.41               | 2.31                          | 1.05                       | X   |
| AT1G15100                 | zinc finger (C3HC4-type RING finger) family protein (RHA2a)                       | 2.40               | 2.33                          | 1.03                       | X   |
| AT3G02150                 | TCP family transcription factor                                                   | 2.38               | 2.13                          | 1.12                       | X   |
| AT4G11360                 | zinc finger (C3HC4-type RING finger) family protein (RHA1b)                       | 2.35               | 2.35                          | 1.00                       | X   |
| AT3G09600                 | myb family transcription factor                                                   | 2.32               | 2.78                          | 0.83                       | X   |
| AT4G00050                 | basic helix-loop-helix (bHLH) family protein                                      | 2.31               | 2.02                          | 1.14                       | X   |
| AT1G01060                 | myb family transcription factor (LHY)                                             | 2.30               | 2.06                          | 1.12                       | D   |
| AT1G78600                 | zinc finger (B-box type) family protein                                           | 2.26               | 2.87                          | 0.79                       | E   |
| AT3G23210                 | basic helix-loop-helix (bHLH) family protein                                      | 2.25               | 1.57                          | 1.43                       | C   |
| AT1G70000                 | DNA-binding family protein                                                        | 2.21               | 1.56                          | 1.42                       | C   |
| AT1G26790                 | Dof-type zinc finger domain-containing protein                                    | 2.20               | 1.59                          | 1.39                       | C   |
| AT2G36080                 | DNA-binding protein                                                               | 2.17               | 1.74                          | 1.24                       | D   |
| AT1G67030                 | zinc finger (C2H2 type) family protein (ZFP6)                                     | 2.16               | 2.41                          | 0.90                       | X   |
| AT1G72030                 | GCN5-related N-acetyltransferase (GNAT) family protein                            | 2.12               | 1.64                          | 1.29                       | C   |
| AT3G10910                 | zinc finger (C3HC4-type RING finger) family protein                               | 2.03               | 1.94                          | 1.05                       | X   |
| AT1G06180                 | myb family transcription factor                                                   | 2.00               | 1.40                          | 1.43                       | X   |

**Photosynthesis/Chloroplast (P/C)**

|           |                                        |      |      |      |   |
|-----------|----------------------------------------|------|------|------|---|
| AT4G17090 | beta-amylase (CT-BMY) / 1              | 3.71 | 4.95 | 0.75 | E |
| AT1G78510 | solaneyl diphosphate synthase (SPS)    | 3.00 | 2.43 | 1.23 | D |
| AT1G17050 | geranyl diphosphate synthase           | 2.66 | 2.36 | 1.13 | D |
| AT1G10960 | ferredoxin                             | 2.20 | 1.54 | 1.43 | C |
| AT1G76570 | chlorophyll A-B binding family protein | 2.03 | 1.69 | 1.20 | D |

**Cellular Metabolism (CM)**

|           |                                                                        |       |      |      |   |
|-----------|------------------------------------------------------------------------|-------|------|------|---|
| AT3G51240 | naringenin 3-dioxygenase / flavanone 3-hydroxylase (F3H)               | 11.51 | 8.91 | 1.29 | C |
| AT5G15950 | adenosylmethionine decarboxylase family protein                        | 4.80  | 3.54 | 1.36 | C |
| AT5G17050 | UDP-glucuronosyl/UDP-glucosyl transferase family protein               | 4.63  | 4.50 | 1.03 | X |
| AT1G73480 | hydrolase                                                              | 4.62  | 4.39 | 1.05 | X |
| AT1G06000 | UDP-glucuronosyl/UDP-glucosyl transferase family protein               | 4.41  | 3.25 | 1.36 | C |
| AT5G64170 | dentin sialophosphoprotein-related                                     | 4.30  | 4.69 | 0.92 | X |
| AT5G20070 | MutT/nudix family protein low                                          | 3.87  | 3.40 | 1.14 | D |
| AT4G17670 | senescence-associated protein-related                                  | 3.21  | 2.37 | 1.35 | C |
| AT4G12310 | cytochrome P450                                                        | 3.06  | 2.92 | 1.05 | X |
| AT5G11110 | sucrose-phosphate synthase                                             | 2.93  | 3.38 | 0.87 | X |
| AT1G48100 | glycoside hydrolase family 28 protein / polygalacturonase              | 2.90  | 2.99 | 0.97 | X |
| AT5G43450 | 2-oxoglutarate-dependent dioxygenase                                   | 2.83  | 3.99 | 0.71 | E |
| AT1G07010 | calcineurin-like phosphoesterase family protein                        | 2.80  | 2.51 | 1.11 | X |
| AT3G21760 | UDP-glucuronosyl/UDP-glucosyl transferase family protein               | 2.69  | 2.21 | 1.22 | D |
| AT1G66330 | senescence-associated family protein                                   | 2.69  | 2.31 | 1.16 | X |
| AT4G20860 | FAD-binding domain-containing protein                                  | 2.69  | 2.89 | 0.93 | X |
| AT4G04840 | methionine sulfoxide reductase domain-containing protein               | 2.66  | 2.06 | 1.29 | C |
| AT2G29340 | short-chain dehydrogenase/reductase (SDR) family protein               | 2.59  | 2.16 | 1.20 | X |
| AT3G47430 | peroxisomal biogenesis factor 11 family protein / PEX11 family protein | 2.55  | 2.01 | 1.27 | C |
| AT4G37760 | squalene monooxygenase                                                 | 2.49  | 2.20 | 1.13 | X |
| AT3G62410 | CP12 domain-containing protein                                         | 2.42  | 1.99 | 1.22 | D |
| AT5G58770 | dehydrodolichyl diphosphate synthase                                   | 2.39  | 2.75 | 0.87 | X |
| AT1G66130 | oxidoreductase N-terminal domain-containing protein                    | 2.37  | 2.10 | 1.13 | X |
| AT1G61890 | MATE efflux family protein                                             | 2.26  | 2.58 | 0.87 | X |
| AT4G11570 | haloacid dehalogenase-like hydrolase family protein                    | 2.22  | 2.35 | 0.95 | X |
| AT1G72500 | inter-alpha-trypsin inhibitor heavy chain-related low                  | 2.19  | 1.88 | 1.17 | X |
| AT1G12240 | beta-fructosidase (BFRUCT4) / beta-fructofuranosidase/ invertase       | 2.17  | 1.70 | 1.28 | C |
| AT4G10040 | cytochrome c                                                           | 2.14  | 2.78 | 0.77 | E |
| AT5G59750 | riboflavin biosynthesis protein                                        | 2.14  | 1.79 | 1.20 | D |
| AT5G03555 | permease                                                               | 2.12  | 1.79 | 1.18 | D |
| AT3G57020 | strictosidine synthase family protein                                  | 2.12  | 2.69 | 0.79 | X |
| AT1G23740 | oxidoreductase                                                         | 2.11  | 1.79 | 1.18 | D |
| AT4G18010 | inositol polyphosphate 5-phosphatase II (IP5PII) nearly                | 2.11  | 2.09 | 1.01 | X |
| AT5G67030 | zeaxanthin epoxidase (ZEP) (ABA1)                                      | 2.08  | 1.99 | 1.04 | X |
| AT3G17790 | acid phosphatase type 5 (ACP5)                                         | 2.08  | 1.72 | 1.20 | D |
| AT4G22100 | glycosyl hydrolase family 1 protein                                    | 2.03  | 2.13 | 0.95 | X |
| AT5G54960 | pyruvate decarboxylase                                                 | 2.03  | 2.30 | 0.88 | X |

**Signaling (S)**

|           |                                                         |      |      |      |   |
|-----------|---------------------------------------------------------|------|------|------|---|
| AT2G02950 | phytochrome kinase substrate 1 (PKS1)                   | 7.21 | 5.14 | 1.40 | C |
| AT2G30040 | protein kinase family protein                           | 6.43 | 6.10 | 1.05 | X |
| AT2G46340 | phytochrome A supressor spa1 (SPA1)                     | 4.79 | 4.95 | 0.97 | X |
| AT5G52250 | transducin family protein / WD-40 repeat family protein | 4.59 | 3.91 | 1.17 | D |

|           |                                                                        |      |      |      |   |
|-----------|------------------------------------------------------------------------|------|------|------|---|
| AT2G24540 | kelch repeat-containing F-box family protein                           | 4.43 | 3.28 | 1.35 | C |
| AT5G58760 | transducin family protein / WD-40 repeat family protein                | 3.42 | 2.47 | 1.39 | C |
| AT1G22770 | gigantea protein (GI)                                                  | 2.99 | 2.60 | 1.15 | D |
| AT5G59730 | exocyst subunit EXO70 family protein leucine zipper-containing protein | 2.92 | 3.77 | 0.78 | E |
| AT1G78070 | WD-40 repeat family protein                                            | 2.51 | 3.39 | 0.74 | X |
| AT1G07150 | protein kinase family protein                                          | 2.50 | 2.41 | 1.04 | X |
| AT1G53090 | WD-40 repeat family protein / phytochrome A-related                    | 2.12 | 2.20 | 0.96 | X |

#### **Transport (TR)**

|           |                                                     |       |       |      |   |
|-----------|-----------------------------------------------------|-------|-------|------|---|
| AT5G44110 | ABC transporter family protein                      | 13.89 | 10.52 | 1.32 | C |
| AT5G02270 | ABC transporter family protein NBD-like protein POP | 8.89  | 7.53  | 1.18 | D |
| AT2G37970 | SOUL heme-binding family protein weak               | 6.22  | 4.44  | 1.40 | C |
| AT2G29650 | inorganic phosphate transporter                     | 2.60  | 2.26  | 1.15 | D |
| AT5G64940 | ABC1 family protein                                 | 2.49  | 1.74  | 1.43 | C |
| AT5G64840 | ABC transporter family protein                      | 2.40  | 1.96  | 1.23 | D |
| AT3G47950 | ATPase                                              | 2.20  | 1.60  | 1.37 | C |
| AT3G24190 | ABC1 family protein                                 | 2.03  | 1.62  | 1.25 | C |

#### **Growth/Development (G/D)**

|           |          |      |      |      |   |
|-----------|----------|------|------|------|---|
| AT1G69530 | expansin | 2.06 | 1.75 | 1.18 | D |
|-----------|----------|------|------|------|---|

#### **Hormones (H)**

|           |                                              |      |      |      |   |
|-----------|----------------------------------------------|------|------|------|---|
| AT1G78440 | gibberellin 2-oxidase / GA2-oxidase (GA2OX1) | 7.94 | 6.51 | 1.22 | D |
| AT4G03400 | auxin-responsive GH3 family protein          | 3.50 | 4.06 | 0.86 | X |
| AT2G38210 | ethylene-responsive protein                  | 2.35 | 1.57 | 1.49 | C |
| AT4G38840 | auxin-responsive protein                     | 2.35 | 1.69 | 1.39 | C |

#### **Stress/Defense (S/D)**

|           |                                                                      |      |      |      |   |
|-----------|----------------------------------------------------------------------|------|------|------|---|
| AT1G64500 | glutaredoxin family protein                                          | 9.04 | 6.72 | 1.34 | C |
| AT5G58750 | wound-responsive protein-related                                     | 4.85 | 3.92 | 1.24 | X |
| AT1G76080 | thioredoxin family protein low                                       | 3.04 | 2.16 | 1.41 | C |
| AT3G22830 | heat shock transcription factor family protein                       | 2.78 | 2.85 | 0.98 | X |
| AT1G19670 | coronatine-responsive protein / coronatine-induced protein 1 (COR11) | 2.68 | 1.98 | 1.36 | C |
| AT5G36910 | thionin (THI2.2)                                                     | 2.38 | 1.64 | 1.46 | C |
| AT2G29450 | glutathione S-transferase (103-1A)                                   | 2.36 | 3.48 | 0.68 | E |
| AT2G16365 | F-box family protein                                                 | 2.34 | 1.72 | 1.36 | C |
| AT4G21870 | 26.5 kDa class P-related heat shock protein (HSP26.5-P)              | 2.14 | 1.64 | 1.30 | C |
| AT2G21970 | stress enhanced protein 2 (SEP2) nearly                              | 2.01 | 1.82 | 1.11 | D |

#### **Hypothetical/Unknown (H/U)**

|           |                   |      |      |      |   |
|-----------|-------------------|------|------|------|---|
| AT3G02910 | expressed protein | 8.38 | 6.69 | 1.25 | C |
| AT3G56290 | expressed protein | 6.99 | 4.87 | 1.43 | C |
| AT3G12320 | expressed protein | 6.47 | 8.21 | 0.79 | E |
| AT3G05800 | expressed protein | 5.54 | 4.83 | 1.15 | D |
| AT2G40080 | expressed protein | 5.01 | 4.24 | 1.18 | X |
| AT4G24700 | expressed protein | 3.60 | 2.78 | 1.29 | X |
| AT4G27657 | expressed protein | 3.59 | 4.48 | 0.80 | X |
| AT1G13670 | expressed protein | 3.23 | 3.09 | 1.05 | X |
| AT4G35660 | expressed protein | 3.19 | 2.99 | 1.07 | X |
| AT1G75100 | expressed protein | 3.17 | 2.51 | 1.26 | C |
| AT4G26850 | expressed protein | 2.98 | 2.12 | 1.41 | C |
| AT1G16720 | expressed protein | 2.95 | 2.11 | 1.40 | C |
| AT1G32690 | expressed protein | 2.82 | 2.55 | 1.10 | X |
| AT5G06980 | expressed protein | 2.81 | 3.49 | 0.80 | X |
| AT2G46420 | expressed protein | 2.66 | 2.09 | 1.27 | C |

|           |                   |      |      |      |   |
|-----------|-------------------|------|------|------|---|
| AT1G79510 | expressed protein | 2.60 | 2.07 | 1.26 | C |
| AT1G70420 | expressed protein | 2.57 | 3.79 | 0.68 | E |
| AT4G12000 | expressed protein | 2.56 | 2.74 | 0.93 | X |
| AT1G50020 | expressed protein | 2.33 | 2.00 | 1.17 | D |
| AT3G23170 | expressed protein | 2.29 | 3.28 | 0.70 | E |
| AT3G45210 | expressed protein | 2.13 | 1.99 | 1.07 | X |
| AT4G28290 | expressed protein | 2.09 | 2.08 | 1.01 | X |
| AT4G33660 | expressed protein | 2.03 | 1.53 | 1.33 | C |
| AT3G02140 | expressed protein | 2.01 | 2.03 | 0.99 | X |

This set comprises genes that (i) display a 2-fold or greater, and statistically significant, increase in expression in response to 1 h Rc in WT seedlings, but (ii) display a smaller than 1.5-Fold (bins C-E, in Fig. 3), or statistically non-significant (Table 2) increase in expression in WT compared to *pif3* in response to 1 h Rc.

Column-heading definitions:

**AGI locus:** AGI locus number

**Description:** Brief gene description or name derived primarily from current TIGR and TAIR websites.

**MFI(WT)(R1/D1):** Mean Fold Induction of expression in wild-type (WT) Arabidopsis seedlings exposed to 1 hour Rc (R1) over the level in dark control seedlings (D1).

**MFI(*pif3*)(R1/D1):** Mean Fold Induction of expression in *pif3* mutant seedlings exposed to 1 h Rc (R1) over the levels in dark control seedlings (D1).

**MFIR(WT/*pif3*):** Mean Fold Induction Ratio =  $[\text{MFI(WT)(R1/D1)}] \div [\text{MFI}(pif3)(R1/D1)]$ .

**Bin:** Bins C-E from Fig. 3. Bin C: genes with MFIR(WT/*pif3*) of 1.25-1.5. Bin D: genes with MFIR(WT/*pif3*) of 1-1.25; Bin E genes with MFIR(*pif3*/WT) of 1-1.50. Bin X: genes that display a 2-fold or greater, and statistically significant, increase in expression in response to 1 h Rc in WT seedlings, but a statistically insignificant difference in the increase in expression in WT compared to *pif3* in response to 1 h Rc.

Genes are grouped into functional categories as indicated and arrayed within these categories by magnitude of Rc-responsiveness in WT (MFI(WT)(R1/D1)) in descending order.
