# Supplementary material
Source: PubMed Central journal article supplement (PMC528976)
Supplement: pnas_101_46_16091__6.pdf [file pnas_101_46_16091__6.pdf]

**Table 9. Gene set 4 (35 genes):** Continuous red light (Rc)-induced genes defined as robustly Rc-light-responsive but not robustly dependent on either phyB or PIF3 for this Rc-light responsiveness

| AGI LOCUS                               | DESCRIPTION                                                 | MFI(WT)<br>(R1/D1) | MFI( <i>pif3</i> )<br>(R1/D1) | MFIR<br>(WT/ <i>pif3</i> ) | BIN |
|-----------------------------------------|-------------------------------------------------------------|--------------------|-------------------------------|----------------------------|-----|
| <b>Transcription (TX)</b>               |                                                             |                    |                               |                            |     |
| AT2G46790                               | pseudo-response regulator 9 (APRR9)                         | 25.50              | 33.19                         | 0.77                       | E   |
| AT5G11260                               | bZIP protein HY5 (HY5)                                      | 5.61               | 6.62                          | 0.85                       | E   |
| AT3G47500                               | Dof-type zinc finger domain (DOF)                           | 5.32               | 5.10                          | 1.04                       | D   |
| AT2G46830                               | myb-related transcription factor (CCA1)                     | 4.18               | 3.87                          | 1.08                       | D   |
| AT5G15850                               | zinc finger protein CONSTANS-LIKE 1 (COL1)                  | 4.10               | 3.05                          | 1.35                       | C   |
| AT4G25470                               | DRE-binding protein (DREB1C) (CBF2)                         | 3.67               | 4.90                          | 0.75                       | E   |
| AT1G06040                               | zinc finger (B-box type) family protein (ZF2)               | 3.61               | 3.51                          | 1.03                       | D   |
| AT1G43160                               | AP2 domain (RAP2.6)                                         | 2.92               | 3.67                          | 0.79                       | E   |
| AT2G28550                               | AP2 domain (RAP2.7)                                         | 2.89               | 2.35                          | 1.23                       | D   |
| AT1G15100                               | zinc finger (C3HC4-type RING finger) family protein (RHA2A) | 2.40               | 2.33                          | 1.03                       | D   |
| AT4G11360                               | zinc finger (C3HC4-type RING finger) family protein (RHA1b) | 2.35               | 2.35                          | 1.00                       | E   |
| <b>Photosynthesis/Chloroplast (P/C)</b> |                                                             |                    |                               |                            |     |
| AT4G17090                               | $\beta$ -amylase (CT-BMY)                                   | 3.71               | 4.95                          | 0.75                       | E   |
| <b>Cellular Metabolism (CM)</b>         |                                                             |                    |                               |                            |     |
| AT3G51240                               | naringenin 3-dioxygenase (F3H)                              | 11.51              | 8.91                          | 1.29                       | C   |
| AT4G20860                               | FAD-binding domain                                          | 2.69               | 2.89                          | 0.93                       | E   |
| AT2G29340                               | short-chain dehydrogenase                                   | 2.59               | 2.16                          | 1.20                       | D   |
| AT4G37760                               | squalene monooxygenase (SQE)                                | 2.49               | 2.20                          | 1.13                       | D   |
| AT4G10040                               | cytochrome c,                                               | 2.14               | 2.78                          | 0.77                       | E   |
| AT1G23740                               | oxidoreductase, zinc-binding dehydrogenase family protein   | 2.11               | 1.79                          | 1.18                       | D   |
| AT5G54960                               | pyruvate decarboxylase,                                     | 2.03               | 2.30                          | 0.88                       | E   |
| <b>Signaling (S)</b>                    |                                                             |                    |                               |                            |     |
| AT2G02950                               | phytochrome kinase substrate 1 (PKS1)                       | 7.21               | 5.14                          | 1.40                       | C   |
| AT2G30040                               | protein kinase family protein protein kinase domain         | 6.43               | 6.10                          | 1.05                       | D   |
| AT2G46340                               | phytochrome A supressor spa1 (SPA1)                         | 4.09               | 3.02                          | 1.35                       | C   |
| <b>Transport (TR)</b>                   |                                                             |                    |                               |                            |     |
| AT5G44110                               | ABC transporter family protein                              | 13.89              | 10.52                         | 1.32                       | C   |
| AT2G37970                               | SOUL heme-binding family protein                            | 6.22               | 4.44                          | 1.40                       | C   |
| AT1G61890                               | MATE efflux family protein                                  | 2.26               | 2.58                          | 0.87                       | E   |
| <b>Growth/Development (G/D)</b>         |                                                             |                    |                               |                            |     |
| AT1G69530                               | expansin (EXP1)                                             | 2.06               | 1.75                          | 1.18                       | D   |
| <b>Hormones (H)</b>                     |                                                             |                    |                               |                            |     |
| AT4G03400                               | auxin-responsive GH3 family protein                         | 3.50               | 4.06                          | 0.86                       | E   |
| AT4G38840                               | auxin-responsive protein,                                   | 2.35               | 1.69                          | 1.39                       | C   |
| <b>Stress/Defense (S/D)</b>             |                                                             |                    |                               |                            |     |
| AT1G74310                               | heat shock protein 101 (HSP101)                             | 2.37               | 13.17                         | 0.18                       | G   |
| AT2G29450                               | glutathione S-transferase (103-1A)                          | 2.36               | 3.48                          | 0.68                       | E   |

|                                   |                                                            |      |       |      |   |
|-----------------------------------|------------------------------------------------------------|------|-------|------|---|
| AT3G09440                         | heat shock cognate 70 kDa protein 3 (HSC70-3)<br>(HSP70-3) | 2.16 | 3.26  | 0.66 | F |
| AT5G52640                         | heat shock protein 81-1 (HSP81-1)                          | 2.15 | 12.11 | 0.18 | G |
| AT2G21970                         | stress enhanced protein 2 (SEP2) nearly                    | 2.01 | 1.82  | 1.11 | D |
| <b>Hypothetical/Unknown (H/U)</b> |                                                            |      |       |      |   |
| AT2G40080                         | expressed protein                                          | 5.01 | 4.24  | 1.18 | D |
| AT1G13930                         | expressed protein                                          | 3.56 | 2.34  | 1.52 | B |

---

This is a subset of Gene set 2 that was defined previously by Tepperman et al. (1) as not, or only marginally, dependent on phyB for Rc-responsiveness.

Column-heading definitions:

**AGI locus:** AGI locus number.

**Description:** Brief gene description or name derived primarily from current TIGR and TAIR websites.

**MFI(WT)(R1/D1):** Mean Fold Induction of expression in wild-type (WT) Arabidopsis seedlings exposed to 1 h Rc (R1) over the level in dark control seedlings (D1).

**MFI(*pif3*)(R1/D1):** Mean Fold Induction of expression in *pif3* mutant seedlings exposed to 1 h Rc (R1) over the levels in dark control seedlings (D1).

**MFIR(WT/*pif3*):** Mean Fold Induction Ratio =  $[\text{MFI(WT)(R1/D1)}] \div [\text{MFI}(pif3)(R1/D1)]$ .

**Bin:** From Fig. 3. Bin C: genes with MFIR(WT/*pif3*) of 1.25-1.5. Bin D: genes with MFIR(WT/*pif3*) of 1-1.25; Bin E genes with MFIR(*pif3*/WT) of 1-1.50.

Genes are grouped into functional categories as indicated and arrayed within these categories by magnitude of Rc-responsiveness in WT (MFI(WT)(R1/D1)) in descending order.

1. Tepperman, J. M., Hudson, M. E., Khanna, R., Zhu, T., Chang, H.-S., Wang, X. & Quail, P. H. (2004) *Plant J.* **38**, 725-739.
