# Supplementary material
Source: PubMed Central journal article supplement (PMC528976)
Supplement: pnas_101_46_16091__7.pdf [file pnas_101_46_16091__7.pdf]

**Table 10. Gene set 3 (39 genes):** Continuous red light (Rc)-Induced genes displaying moderately to robustly greater Rc-light-induced expression in the *pif3* mutant than in WT.

| AGI LOCUS                       | DESCRIPTION                                                       | MFI(WT)<br>(R1/D1) | MFI( <i>pif3</i> )<br>(R1/D1) | Inverse MFIR<br>( <i>pif3</i> /WT) | BIN |
|---------------------------------|-------------------------------------------------------------------|--------------------|-------------------------------|------------------------------------|-----|
| <b>Transcription (TX)</b>       |                                                                   |                    |                               |                                    |     |
| AT5G04340                       | zinc finger (C2H2 type) family protein (ZF7)                      | 2.87               | 7.36                          | 2.57                               | G   |
| AT5G59820                       | zinc finger (C2H2 type) family protein (ZAT12)(ZF5)               | 2.59               | 9.19                          | 3.54                               | G   |
| AT5G05410                       | DRE-binding protein (DREB2A)(CBF2)                                | 2.27               | 6.45                          | 2.85                               | G   |
| AT3G24500                       | ethylene-responsive transcriptional coactivator,                  | 2.17               | 8.75                          | 4.03                               | G   |
| AT5G63790                       | no apical meristem (NAM) family protein                           | 1.66               | 3.83                          | 2.30                               | G   |
| AT2G47270                       | expressed protein                                                 | 1.54               | 2.45                          | 1.59                               | F   |
| AT1G71030                       | myb family transcription factor                                   | 1.53               | 2.50                          | 1.64                               | F   |
| AT1G77450                       | no apical meristem (NAM) family protein                           | 1.42               | 2.73                          | 1.92                               | F   |
| AT1G01720                       | no apical meristem (NAM) family protein                           | 1.31               | 2.36                          | 1.80                               | F   |
| <b>Cellular Metabolism (CM)</b> |                                                                   |                    |                               |                                    |     |
| AT2G36790                       | UDP-glucuronosyl/UDP-glucosyl                                     | 3.85               | 6.64                          | 1.73                               | F   |
| AT4G13180                       | short-chain dehydrogenase/reductase                               | 1.86               | 2.92                          | 1.57                               | F   |
| AT1G07350                       | transformer serine/arginine-rich ribonucleoprotein                | 1.50               | 3.24                          | 2.17                               | G   |
| AT4G24380                       | expressed protein                                                 | 1.41               | 3.25                          | 2.30                               | G   |
| AT5G45340                       | cytochrome P450                                                   | 1.38               | 2.35                          | 1.70                               | F   |
| <b>Signaling (S)</b>            |                                                                   |                    |                               |                                    |     |
| AT5G49480                       | sodium-inducible calcium-binding protein (ACP1)                   | 3.97               | 6.40                          | 1.61                               | F   |
| AT3G09350                       | armadillo/beta-catenin repeat family protein                      | 1.63               | 5.42                          | 3.32                               | G   |
| AT1G63090                       | F-box family protein                                              | 1.60               | 2.52                          | 1.58                               | F   |
| <b>Transport (TR)</b>           |                                                                   |                    |                               |                                    |     |
| AT1G79410                       | transporter-related low similarity to organic anion transporter 3 | 1.86               | 3.50                          | 1.88                               | F   |
| <b>Growth/Development (G/D)</b> |                                                                   |                    |                               |                                    |     |
| AT5G12110                       | elongation factor 1B alpha-subunit 1 (eEF1Balpha1)                | 1.33               | 3.13                          | 2.36                               | G   |
| <b>Stress/Defense (S/D)</b>     |                                                                   |                    |                               |                                    |     |
| AT3G12580                       | heat shock protein 70,                                            | 2.76               | 10.62                         | 3.85                               | G   |
| AT2G20560                       | DNAJ heat shock family protein SP Q9UDY4 DnaJ homolog             | 2.38               | 12.13                         | 5.09                               | G   |
| AT1G74310                       | heat shock protein 101 (HSP101)                                   | 2.37               | 13.17                         | 5.55                               | G   |
| AT4G12400                       | stress-inducible protein,                                         | 2.31               | 9.68                          | 4.18                               | G   |
| AT3G09440                       | heat shock cognate 70 kDa protein 3 (HSC70-3)                     | 2.16               | 3.26                          | 1.50                               | F   |
| AT5G52640                       | heat shock protein 81-1 (HSP81-1)                                 | 2.15               | 12.11                         | 5.64                               | G   |
| AT5G47910                       | respiratory burst oxidase protein D (RbohD)                       | 2.11               | 3.26                          | 1.55                               | F   |
| AT3G44630                       | disease resistance protein RPP1-WsB-like                          | 1.85               | 2.87                          | 1.55                               | F   |
| AT3G14200                       | DNAJ heat shock N-terminal domain-containing protein              | 1.72               | 3.49                          | 2.02                               | G   |
| AT1G59860                       | 17.6 kDa class I heat shock protein (HSP17.6A-CI)                 | 1.56               | 15.24                         | 9.77                               | G   |
| AT1G72940                       | disease resistance protein (TIR-NBS class),                       | 1.47               | 2.84                          | 1.93                               | F   |
| AT5G16990                       | NADP-dependent oxidoreductase                                     | 1.44               | 2.61                          | 1.82                               | F   |

|                                   |                                                       |      |      |      |   |
|-----------------------------------|-------------------------------------------------------|------|------|------|---|
| AT2G47730                         | glutathione S-transferase 6 (GST6)                    | 1.40 | 2.42 | 1.72 | F |
| <b>Hypothetical/Unknown (H/U)</b> |                                                       |      |      |      |   |
| AT5G12010                         | expressed protein                                     | 2.00 | 4.74 | 2.36 | G |
| AT3G51660                         | macrophage migration inhibitory factor family protein | 1.99 | 4.43 | 2.23 | G |
| AT5G59510                         | expressed protein                                     | 1.95 | 3.90 | 2.01 | G |
| AT5G64510                         | expressed protein                                     | 1.88 | 5.40 | 2.88 | G |
| AT3G07090                         | expressed protein                                     | 1.71 | 3.29 | 1.92 | F |
| AT2G19310                         | expressed protein                                     | 1.54 | 3.15 | 2.05 | G |
| AT4G29780                         | expressed protein                                     | 1.39 | 4.37 | 3.15 | G |

---

This set comprises Bins F and G in Fig. 3.

Column-heading definitions:

**AGI locus:** AGI locus number.

**Description:** Brief gene description or name derived primarily from current TIGR and TAIR websites.

**MFI(WT)(R1/D1):** Mean Fold Induction of expression in wild-type (WT) Arabidopsis seedlings exposed to 1 h Rc (R1) over the level in dark control seedlings (D1).

**MFI(*pif3*)(R1/D1):** Mean Fold Induction of expression in *pif3* mutant seedlings exposed to 1 h Rc (R1) over the levels in dark control seedlings (D1).

**Inverse MFIR(*pif3*/WT):** Mean Fold Induction Ratio =  $[\text{MFI}(\textit{pif3})(\text{R1/D1})] \div [\text{MFI}(\textit{WT})(\text{R1/D1})]$ .

**Bin:** From Fig. 3. Bin F: genes with inverse MFIR(*pif3*/WT) of 1.5-2. Bin G: genes with an inverse MFIR(*pif3*/WT)  $\geq 2$ .

Genes are grouped into functional categories as indicated and arrayed within these categories by magnitude of Rc-responsiveness in WT (MFI(WT)(R1/D1)) in descending order.
