# Supplementary material
Source: PubMed Central journal article supplement (PMC528976)
Supplement: pnas_101_46_16091__8.pdf [file pnas_101_46_16091__8.pdf]

**Table 11. Gene set 5 (37 genes):** Continuous red light (Rc)-repressed genes defined as robustly Rc-light-repressed and statistically-dependent on PIF3 for Rc-light-repression.

| AGI_LOCUS       | Description                                                           | Function | MFR(WT)<br>(D1/R1) | MFR(pif3)<br>(D1/R1) | MFRR<br>(WT/pif3) | BIN |
|-----------------|-----------------------------------------------------------------------|----------|--------------------|----------------------|-------------------|-----|
| <b>Bin A</b>    |                                                                       |          |                    |                      |                   |     |
| AT5G02580       | expressed protein                                                     | H/U      | 6.11               | 1.99                 | 3.07              | A   |
| AT3G25730       | AP2 domain-containing transcription factor                            | TXN      | 2.75               | 0.79                 | 3.49              | A   |
| AT4G01250       | WRKY family transcription factor                                      | TXN      | 2.23               | 0.83                 | 2.68              | A   |
| <b>Bin B</b>    |                                                                       |          |                    |                      |                   |     |
| AT2G21910       | cytochrome P450, putative                                             | CM       | 3.49               | 2.31                 | 1.51              | B   |
| AT1G13260       | DNA-binding protein RAV1 (RAV1)                                       | TXN      | 2.69               | 1.53                 | 1.76              | B   |
| AT3G01450       | expressed protein                                                     | H/U      | 2.66               | 1.39                 | 1.91              | B   |
| AT3G29370       | expressed protein                                                     | H/U      | 2.55               | 1.66                 | 1.54              | B   |
| AT2G28400       | expressed protein contains Pfam profile PF04520                       | H/U      | 2.11               | 1.18                 | 1.79              | B   |
| <b>Bin C</b>    |                                                                       |          |                    |                      |                   |     |
| AT4G16780       | homeobox-leucine zipper protein 4 (HAT4)                              | TXN      | 4.54               | 3.05                 | 1.49              | C   |
| AT4G35720       | expressed protein contains Pfam profile PF03087                       | H/U      | 4.21               | 2.94                 | 1.43              | C   |
| AT5G07010       | sulfotransferase family protein similar to steroid sulfotransferase 3 | CM       | 3.95               | 2.68                 | 1.47              | C   |
| AT5G44260       | zinc finger (CCCH-type) family protein                                | TXN      | 3.71               | 2.92                 | 1.27              | C   |
| AT4G08950       | phosphate-responsive protein, putative (EXO) similar to phi-1         | SIG      | 3.31               | 2.64                 | 1.25              | C   |
| AT4G10240       | zinc finger (B-box type) family protein                               | TXN      | 3.13               | 2.19                 | 1.43              | C   |
| AT4G16670       | expressed protein                                                     | H/U      | 2.92               | 2.32                 | 1.26              | C   |
| AT4G14465       | DNA-binding protein-related contains AT-hook motif                    | TXN      | 2.47               | 1.79                 | 1.38              | C   |
| AT3G57800       | basic helix-loop-helix (bHLH) family protein                          | TXN      | 2.09               | 1.59                 | 1.32              | C   |
| AT2G37680       | phytochrome A specific signal transduction component (FHY1)           | SIG      | 2.08               | 1.51                 | 1.38              | C   |
| AT5G18600       | glutaredoxin family protein                                           | TR       | 2.06               | 1.41                 | 1.46              | C   |
| <b>Bin D</b>    |                                                                       |          |                    |                      |                   |     |
| AT4G36010       | pathogenesis-related thaumatin family protein                         | S/D      | 4.09               | 3.37                 | 1.21              | D   |
| AT3G60390       | homeobox-leucine zipper protein 3 (HAT3)                              | TXN      | 2.79               | 2.48                 | 1.13              | D   |
| AT1G14920       | gibberellin response modulator (GAI) (RGA2)                           | H        | 2.52               | 2.22                 | 1.14              | D   |
| AT5G61440       | thioredoxin family protein                                            | S/D      | 2.13               | 1.81                 | 1.18              | D   |
| AT3G58620       | tetratricopeptide repeat (TPR)-containing protein                     | CM       | 2.10               | 1.74                 | 1.21              | D   |
| AT1G71970       | expressed protein                                                     | H/U      | 2.01               | 1.79                 | 1.12              | D   |
| AT5G60680       | expressed protein contains Pfam profile PF04520                       | H/U      | 2.01               | 1.69                 | 1.19              | D   |
| <b>Bin E</b>    |                                                                       |          |                    |                      |                   |     |
| AT2G18300       | basic helix-loop-helix (bHLH) family protein                          | TXN      | 2.08               | 2.47                 | 0.84              | E   |
| AT2G20750       | $\beta$ -expansin, putative (EXPB1)                                   | G/D      | 1.64               | 2.42                 | 0.68              | E   |
| AT5G02550       | expressed protein                                                     | H/U      | 1.70               | 2.25                 | 0.75              | E   |
| AT3G54770       | RNA recognition motif (RRM)-containing protein                        | TXN      | 1.66               | 2.16                 | 0.77              | E   |
| AT5G66330       | leucine-rich repeat family protein                                    | SIG      | 1.56               | 2.11                 | 0.74              | E   |
| AT1G15550       | gibberellin 3-beta-dioxygenase /hydroxylase (GA4)                     | H        | 1.39               | 2.10                 | 0.66              | E   |
| AT4G25420       | gibberellin 20-oxidase                                                | H        | 1.50               | 2.04                 | 0.73              | E   |
| AT1G49200       | zinc finger (C3HC4-type RING finger) family protein                   | TXN      | 1.57               | 2.02                 | 0.78              | E   |
| AT1G13250       | glycosyl transferase family 8 protein                                 | CM       | 1.68               | 2.02                 | 0.83              | E   |
| <b>Bin F</b>    |                                                                       |          |                    |                      |                   |     |
| AT4G30170       | peroxidase, putative identical to peroxidase ATP8a                    | S/D      | 1.31               | 2.17                 | 0.61              | F   |
| AT5G02890       | transferase family protein contains                                   | CM       | 1.40               | 2.37                 | 0.59              | F   |
| <b>No Bin G</b> |                                                                       |          |                    |                      |                   |     |

This set comprises all genes from Fig. 12 displaying a 2-fold or greater decrease in expression in response to 1 h Rc in WT (Bins A-D in Fig. 12) or in *pif3* (Bins E and F in Fig. 12), arranged according to Bin in Fig. 12.

Column-heading definitions:

**AGI locus:** AGI locus number.

**Description:** Brief gene description or name derived primarily from current TIGR and TAIR websites.

**Function:** Functional category: Transcription (TXN); Cellular Metabolism (CM); Signaling (SIG); Transport (TR); Hormones (H); Growth and Development (G/D); Stress/Defense (S/D); Hypothetical/Unknown (H/U).

**MFR(WT)(D1/R1):** Mean Fold Repression of expression in wild-type (WT) Arabidopsis seedlings exposed to 1 h Rc (R1) compared to the level in dark control seedlings (D1).

**MFR(*pif3*)(D1/R1):** Mean Fold Repression of expression in *pif3* mutant seedlings exposed to 1 h Rc (R1) compared to the level in dark control seedlings (D1).

**MFR(WT/*pif3*):** Mean Fold Repression Ratio =  $[\text{MFR(WT)(D1/R1)}] \div [\text{MFR}(pif3)(D1/R1)]$

**Bin:** From Fig. 12.
