# Supplementary material
Source: PubMed Central journal article supplement (PMC528976)
Supplement: pnas_101_46_16091__9.pdf [file pnas_101_46_16091__9.pdf]

PIF3 204 repressed genes

A.

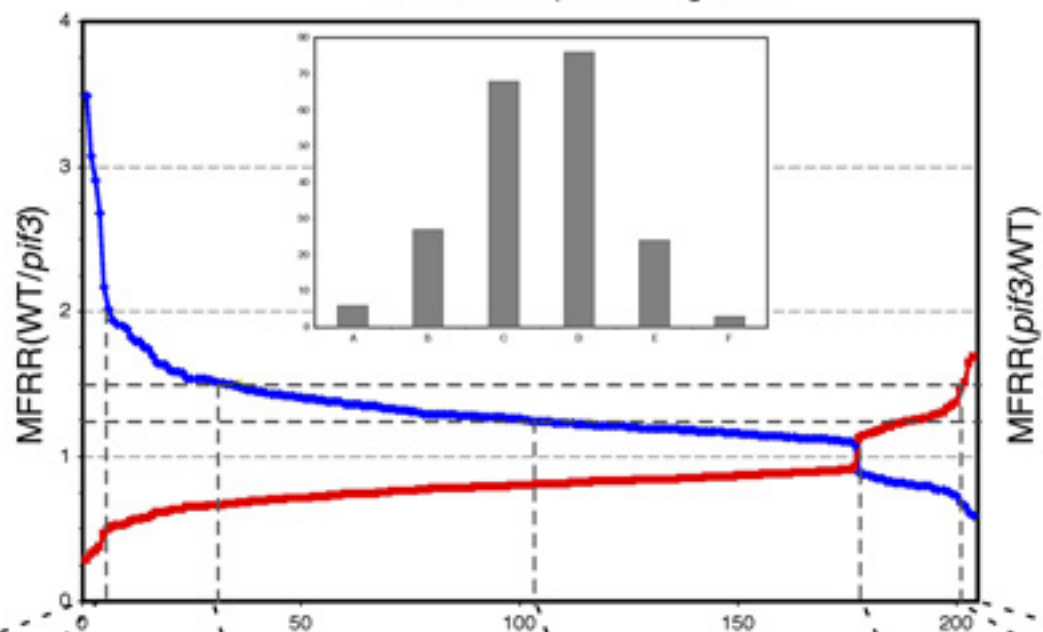

B.

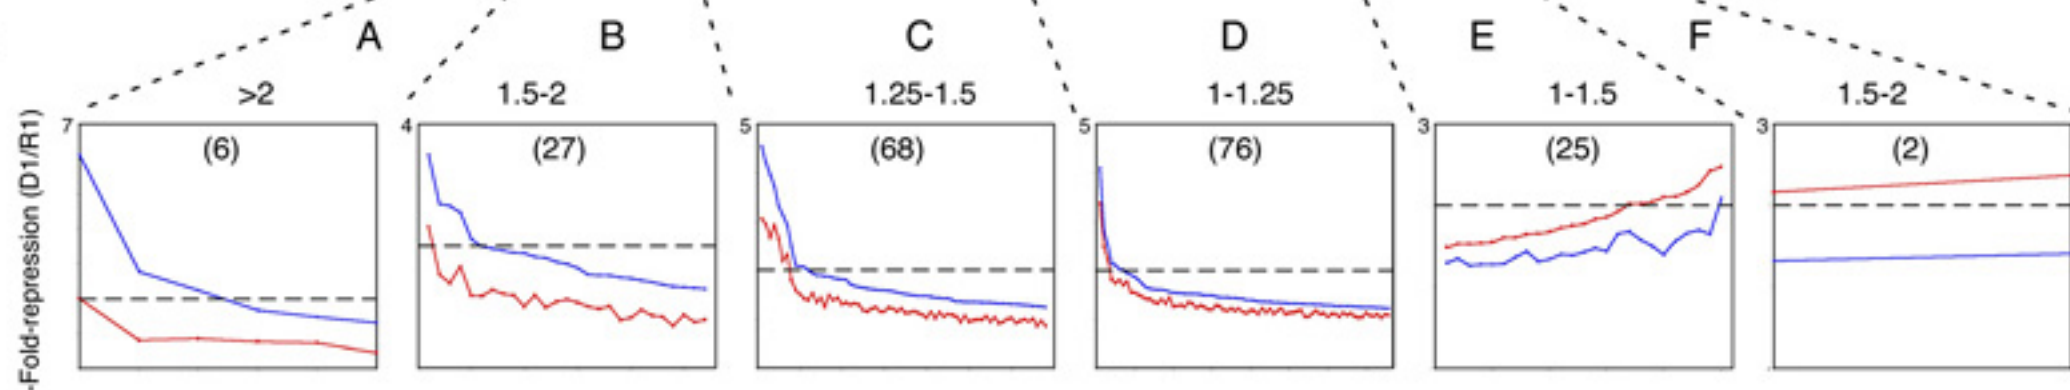

C.

%ANNOTATED GENES >2-FOLD (REPRESSED)

|       | A      | A         | B      | B         | C      | C         | D      | D         | E      | E         | F      | F         |
|-------|--------|-----------|--------|-----------|--------|-----------|--------|-----------|--------|-----------|--------|-----------|
|       | #GENES | %OF/ANNOT |
| TX    | 2      | 100       | 1      | 50        | 5      | 56        | 2      | 40        | 2      | 29        | 0      | 0         |
| P/C   | 0      | 0         | 0      | 0         | 0      | 0         | 0      | 0         | 0      | 0         | 0      | 0         |
| C/M   | ----   | ----      | 1      | 50        | 1      | 11        | 1      | 20        | ----   | ----      | 1      | 50        |
| S     | ----   | ----      | ----   | ----      | 2      | 22        | ----   | ----      | 1      | 14        | ----   | ----      |
| TR    | ----   | ----      | ----   | ----      | 1      | 11        | ----   | ----      | ----   | ----      | ----   | ----      |
| G/D   | ----   | ----      | ----   | ----      | ----   | ----      | ----   | ----      | 1      | 14        | ----   | ----      |
| H     | ----   | ----      | ----   | ----      | ----   | ----      | ----   | ----      | 3      | 43        | ----   | ----      |
| S/D   | ----   | ----      | ----   | ----      | ----   | ----      | 2      | 40        | ----   | ----      | 1      | 50        |
| H/U   | 1      | ----      | 3      | ----      | 2      | ----      | 2      | ----      | 1      | ----      | ----   | ----      |
| TOTAL | 3      | 100       | 5      | 100       | 11     | 100       | 7      | 100       | 8      | 100       | 2      | 100       |
